# Supplementary material for: Pyrazolium-based electrolyte for solid-state dye-sensitized solar cells with high fill factor and open-circuit voltage
Source: Royal Society of Chemistry journal article supplement (doi:10.1039/c6tc01687a), 2016-01-01
Supplement: c6tc01687a1.pdf [file c6tc01687a1.pdf]

Supporting information for:

**Pyrazolium Based Electrolyte for Solid-State Dye-Sensitized Solar  
Cells with High Fill Factor and Open-Circuit Voltage**

Tong He<sup>c</sup>, Ye Feng Wang<sup>\*a,b</sup>, Jing Hui Zeng<sup>\*a,c</sup>

<sup>a</sup>Shaanxi Provincial Key Laboratory of Macromolecular Science and <sup>b</sup>School of Chemistry & Chemical Engineering, <sup>c</sup>School of Material Science and Engineering, Shaanxi Normal University, Xi'an, China, 710062.

---

\* To whom all corresponding should be addressed. Email: wangyefeng@snnu.edu.cn, nanosci@snnu.edu.cn

**Part 1  $^1\text{H}$  NMR,  $^{13}\text{C}$  NMR and ESI - MS of  $\text{Py}_n\text{C}_6$  ( $n = 2, 1$ ; anion = Br) (Fig. S1 – S2).**

**Fig. S1**  $\text{Py}_2\text{C}_6$  (anion = Br)  $^1\text{H}$  NMR (300 MHz,  $\text{D}_2\text{O}$ )  $\delta$  8.15 (dd,  $J = 8.4, 2.8$  Hz, 2H), 6.72 (t,  $J = 2.9$  Hz, 1H), 4.40 (dd,  $J = 13.8, 6.7$  Hz, 4H), 1.88 (s, 2H), 1.50 (t,  $J = 7.3$  Hz, 3H), 1.36 (s, 2H).  $^{13}\text{C}$  NMR (101 MHz,  $\text{D}_2\text{O}$ )  $\delta$  136.80, 136.08, 107.51, 49.74, 45.38, 28.04, 24.95, 13.36. MS Calculated for  $\text{C}_{16}\text{H}_{28}\text{BrN}_4$  ( $m/z$ ): 355.1493, Found: 355.1492.

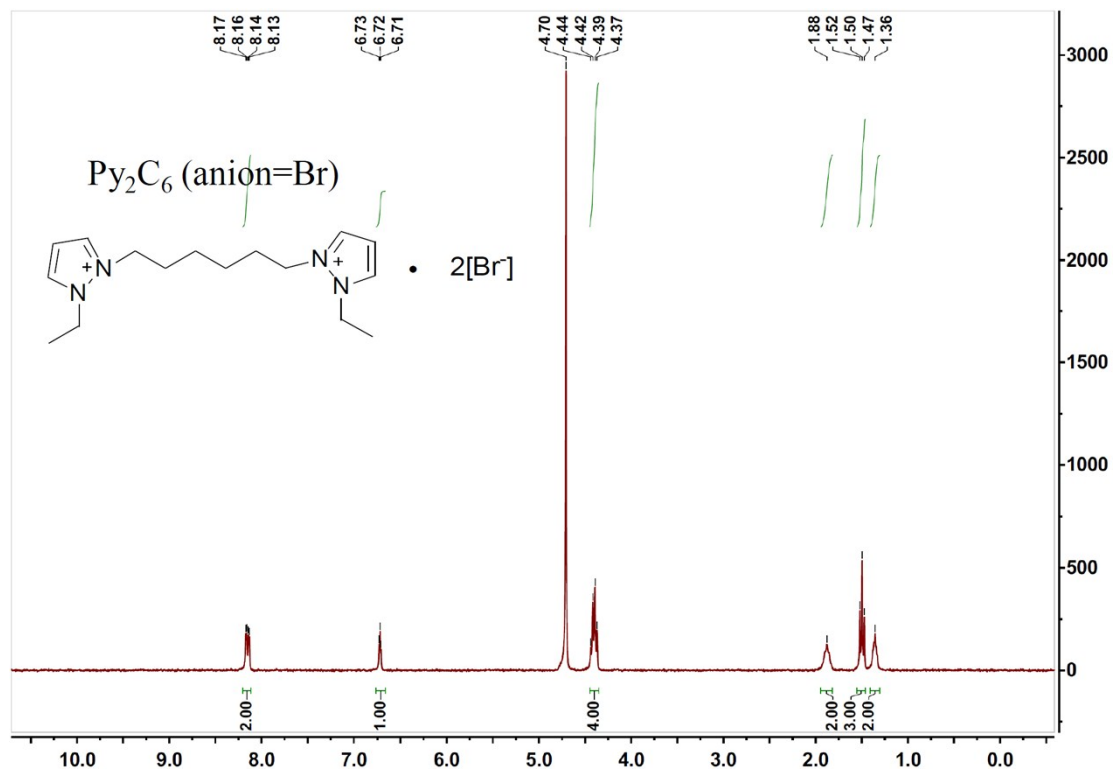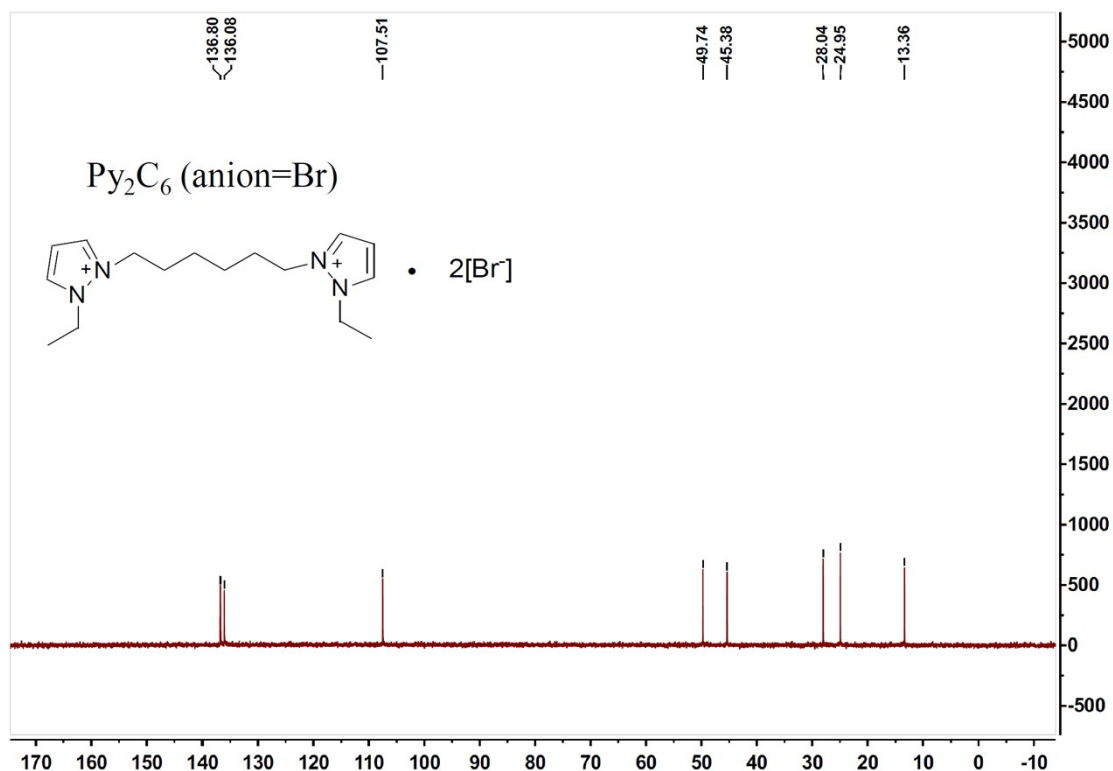

# Display Report

## Analysis Info

Analysis Name D:\Data\FAN\data\2015\1228\ht1.d  
Method pos\_low-20151116.m  
Sample Name hetong  
Comment

Acquisition Date 12/28/2015 10:31:40 AM

Operator Fan  
Instrument maXis 10103

## Acquisition Parameter

|             |            |                       |           |                  |           |
|-------------|------------|-----------------------|-----------|------------------|-----------|
| Source Type | ESI        | Ion Polarity          | Positive  | Set Nebulizer    | 0.4 Bar   |
| Focus       | Not active | Set Capillary         | 4500 V    | Set Dry Heater   | 180 °C    |
| Scan Begin  | 100 m/z    | Set End Plate Offset  | -500 V    | Set Dry Gas      | 4.0 l/min |
| Scan End    | 1000 m/z   | Set Collision Cell RF | 200.0 Vpp | Set Divert Valve | Waste     |

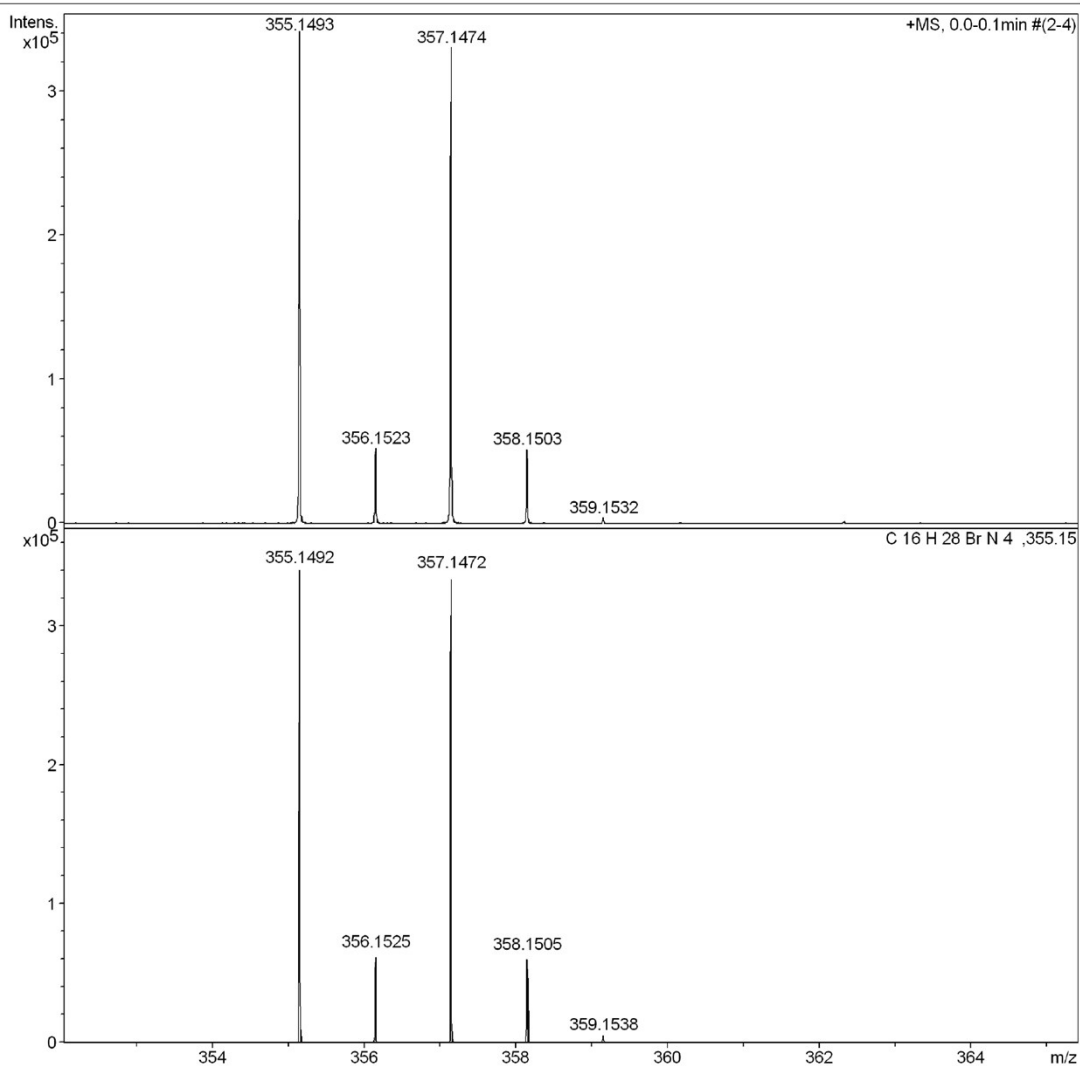

**Fig. S2** PyC<sub>6</sub>·(anion = Br) <sup>1</sup>H NMR (400 MHz, DMSO) δ 8.61 (d, *J* = 2.2 Hz, 2H), 6.94 (s, 1H), 4.50 (q, *J* = 8.0 Hz, 4H), 1.82 (s, 2H), 1.47 (t, *J* = 7.1 Hz, 3H), 1.29 (s, 6H), 0.88 (d, *J* = 6.0 Hz, 3H). <sup>13</sup>C NMR (101 MHz, DMSO) δ 137.15, 136.49, 107.34, 49.32, 44.88, 30.50, 28.27, 25.12, 21.86, 14.06, 13.79. MS Calculated for C<sub>11</sub>H<sub>21</sub>N<sub>2</sub> (m/z): 181.1698, Found: 181.1699.

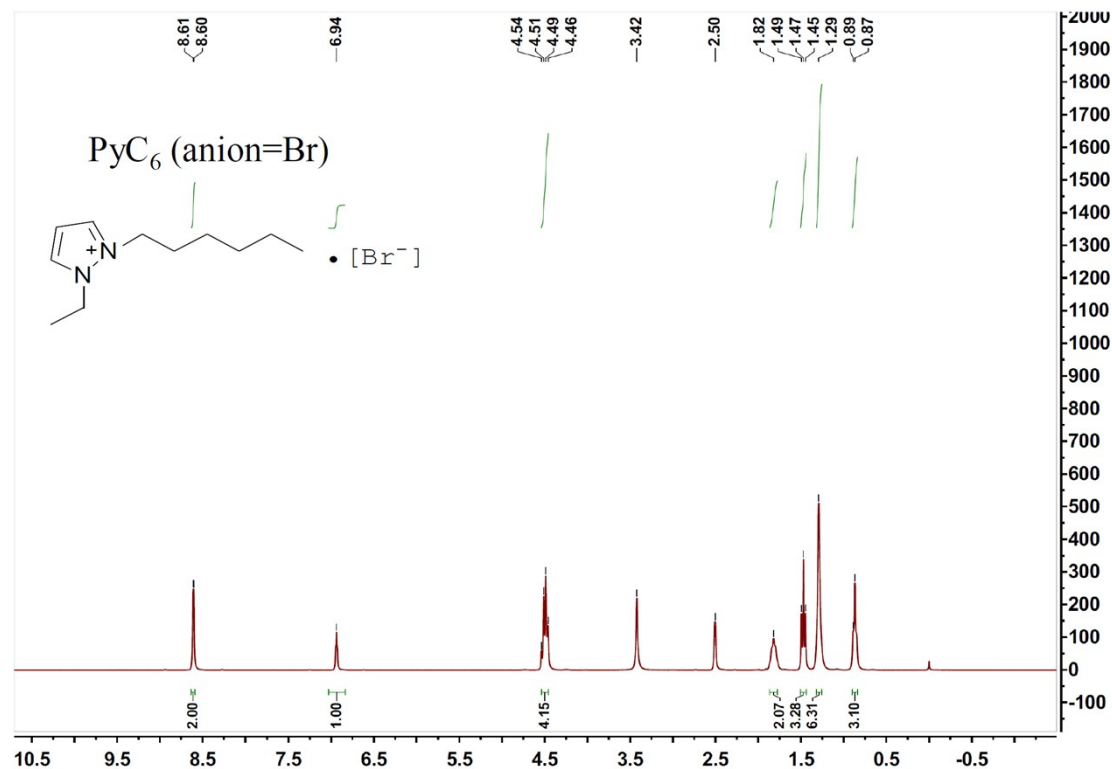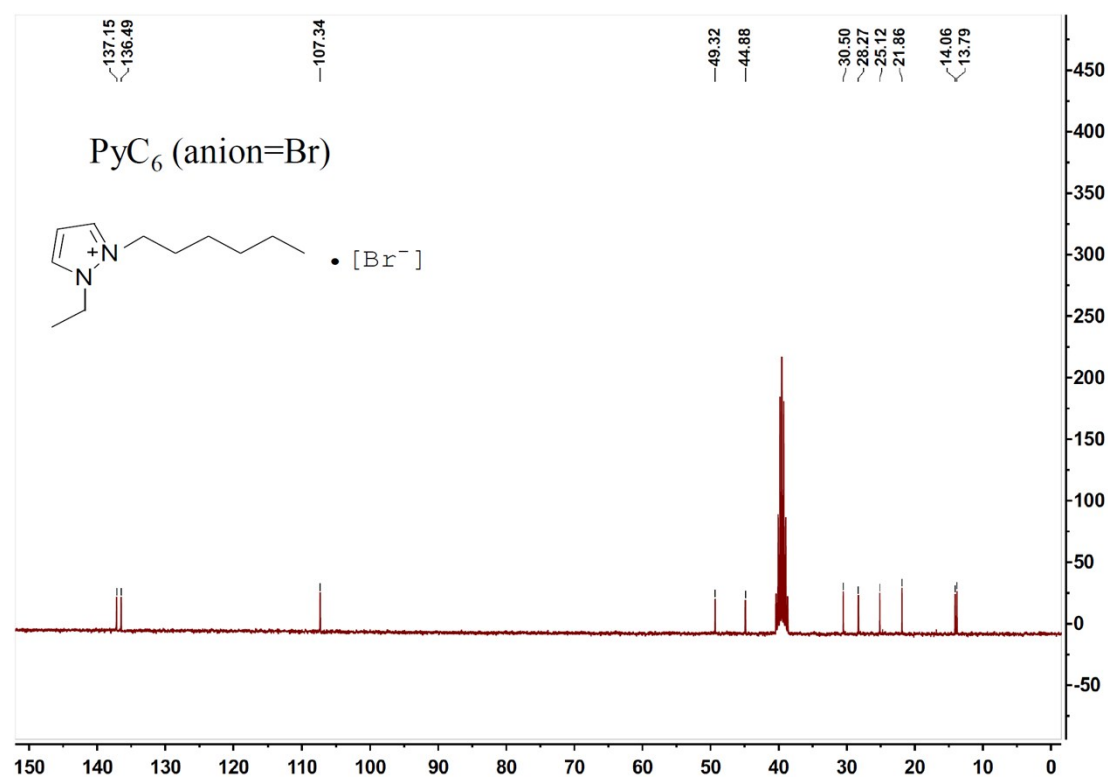

# Display Report

## Analysis Info

Analysis Name D:\Data\FAN\data\2015\1228\ht2.d  
Method pos\_low-20151116.m  
Sample Name hetong  
Comment

Acquisition Date 12/28/2015 10:35:50 AM

Operator Fan  
Instrument maXis 10103

## Acquisition Parameter

|             |            |                       |           |                  |           |
|-------------|------------|-----------------------|-----------|------------------|-----------|
| Source Type | ESI        | Ion Polarity          | Positive  | Set Nebulizer    | 0.4 Bar   |
| Focus       | Not active | Set Capillary         | 4500 V    | Set Dry Heater   | 180 °C    |
| Scan Begin  | 100 m/z    | Set End Plate Offset  | -500 V    | Set Dry Gas      | 4.0 l/min |
| Scan End    | 1000 m/z   | Set Collision Cell RF | 200.0 Vpp | Set Divert Valve | Waste     |

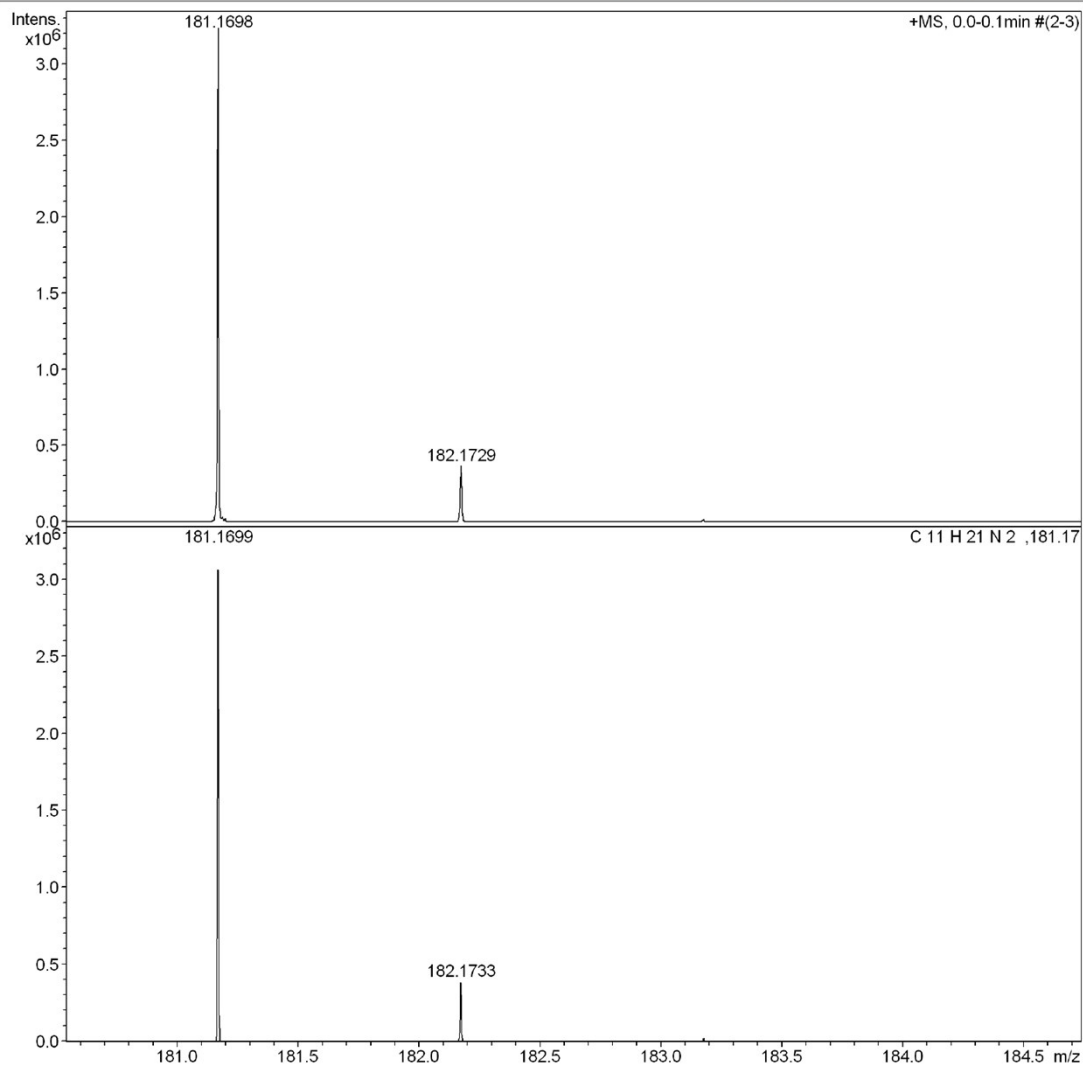

**Part 2  $^1\text{H}$  NMR of  $\text{Py}_n\text{C}_6$  ( $n = 2, 1$ ) (Fig. S3 – S4).**

**Fig. S3**  $\text{Py}_2\text{C}_6$   $^1\text{H}$  NMR (400 MHz,  $\text{D}_2\text{O}$ )  $\delta$  8.14 (dd,  $J = 8.2, 2.7$  Hz, 2H), 6.71 (t,  $J = 3.0$  Hz, 1H), 4.39 (dd,  $J = 13.8, 6.6$  Hz, 4H), 1.87 (s, 2H), 1.49 (t,  $J = 7.3$  Hz, 3H), 1.35 (t,  $J = 7.4$  Hz, 2H).

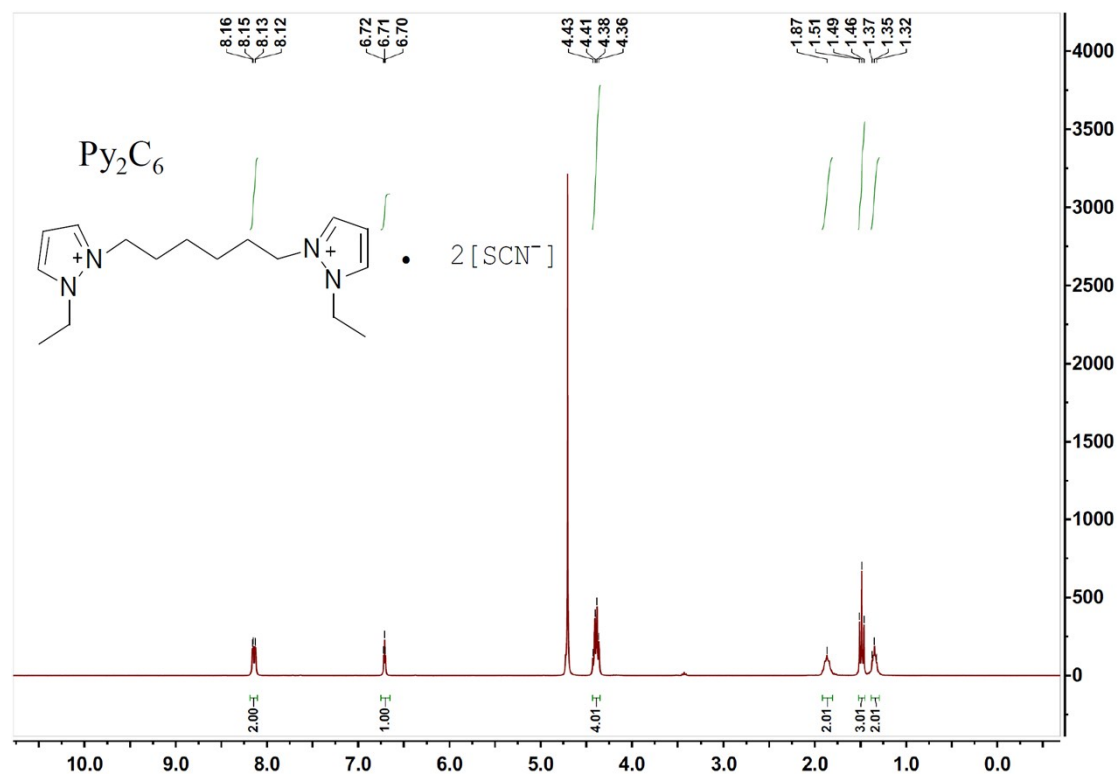

**Fig. S4**  $\text{PyC}_6$   $^1\text{H}$  NMR (400 MHz, DMSO)  $\delta$  8.60 (d,  $J = 2.5$  Hz, 2H), 6.94 (t,  $J = 2.6$  Hz, 1H), 4.53 – 4.45 (m, 4H), 1.82 (s, 2H), 1.47 (t,  $J = 7.2$  Hz, 3H), 1.29 (s, 6H), 0.88 (d,  $J = 6.3$  Hz, 3H).

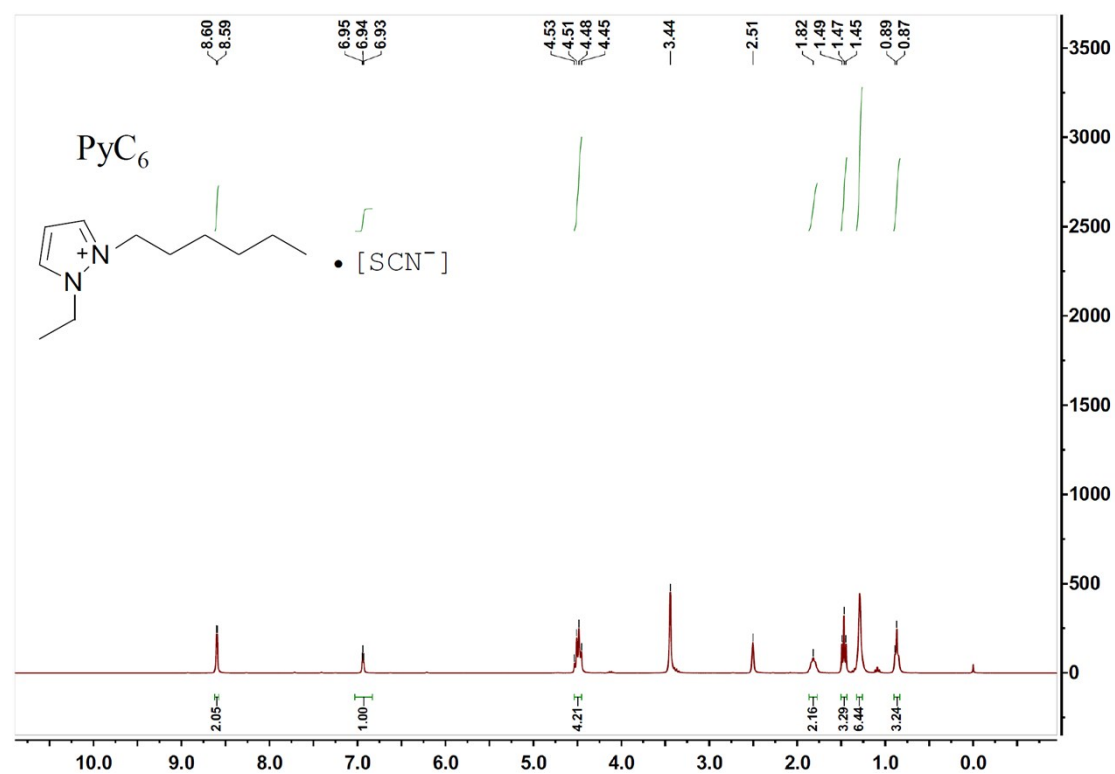

**Part3 IR spectra for  $\text{Py}_n\text{C}_6$  ( $n = 2, 1$ ; anion = Br) and  $\text{Py}_n\text{C}_6$  ( $n = 2, 1$ ) (Fig. S5).**

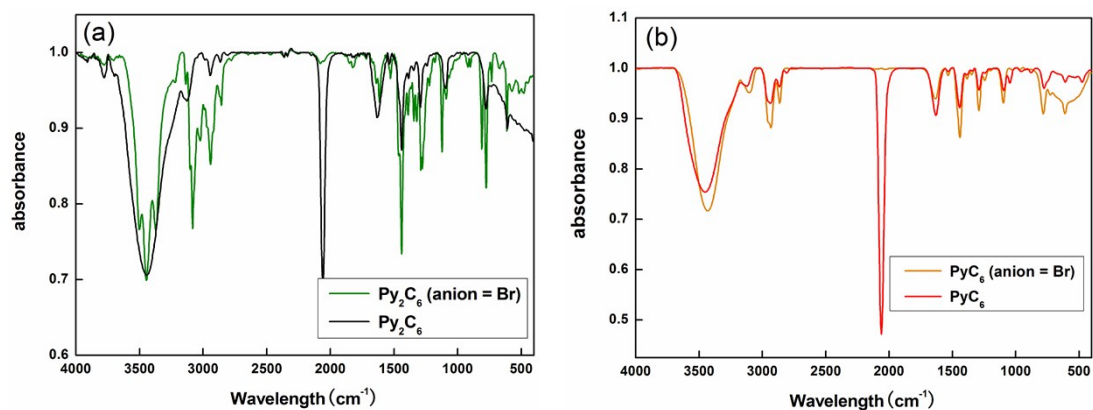

**Fig. S5** IR spectra for (a)  $\text{Py}_2\text{C}_6$  (anion = Br) and  $\text{Py}_2\text{C}_6$ , (b)  $\text{PyC}_6$  (anion = Br) and  $\text{PyC}_6$ . In the IR spectra,  $2070\text{cm}^{-1}$  is the characteristics absorption peak of the stretching vibration for  $\text{SCN}^-$ .<sup>1</sup>This suggests the success of the anion exchange.

**Part 4 XRD patterns for  $\text{Py}_n\text{C}_6$  ( $n = 2, 1$ ; anion = Br) and  $\text{Py}_n\text{C}_6$  ( $n = 2, 1$ ) (Fig. S6).**

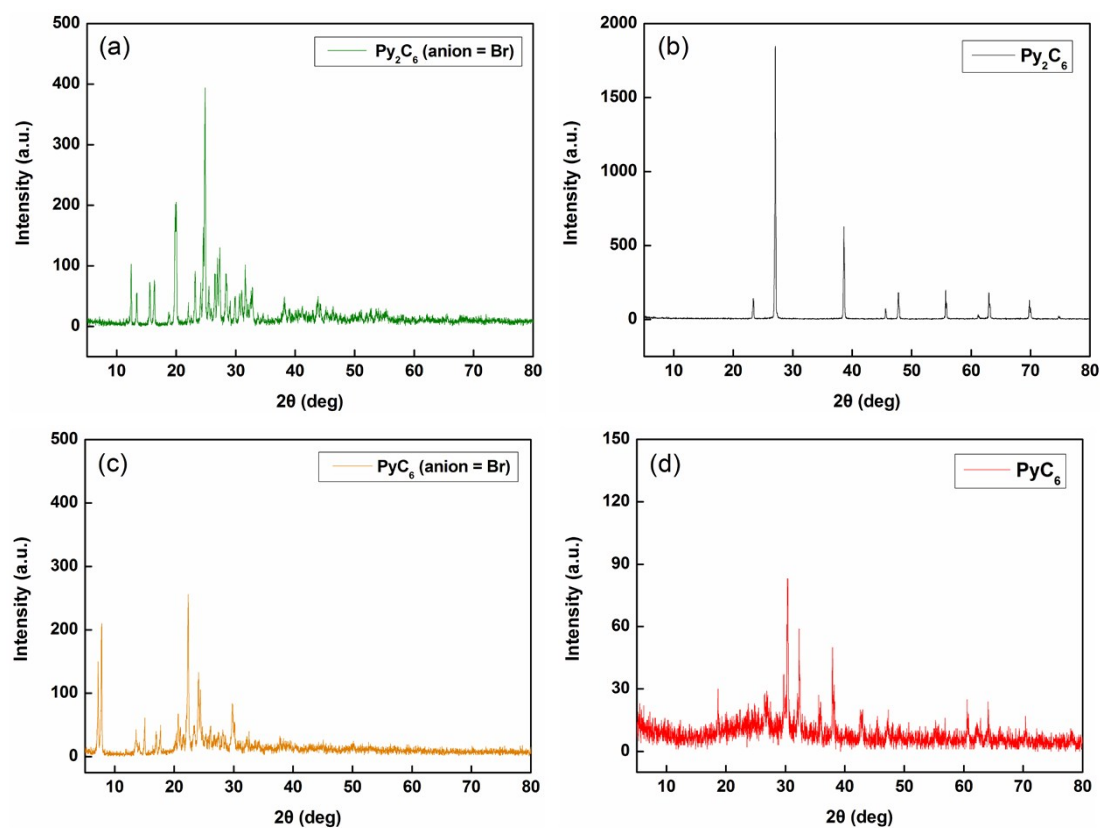

**Fig. S6** XRD patterns for (a)  $\text{Py}_2\text{C}_6$  (anion = Br), (b)  $\text{Py}_2\text{C}_6$ , (c)  $\text{PyC}_6$  (anion = Br) and (d)  $\text{PyC}_6$ .

**Part 5 The thermal gravimetric analysis (TGA, 5% weight loss) and differential scanning calorimeter (DSC) for  $\text{Py}_n\text{C}_6$  ( $n = 2, 1$ ; anion = Br) and  $\text{Py}_n\text{C}_6$  ( $n = 2, 1$ ) (Fig. S7 – S8).**

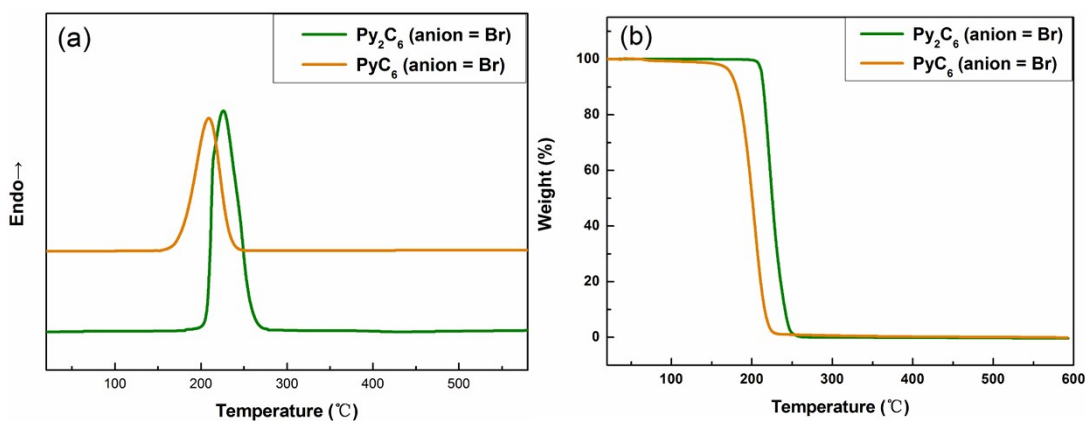

**Fig. S7** (a) DSC curves and (b) TGA curves of a series of  $\text{Py}_n\text{C}_6$  ( $n = 2, 1$ ; anion = Br).

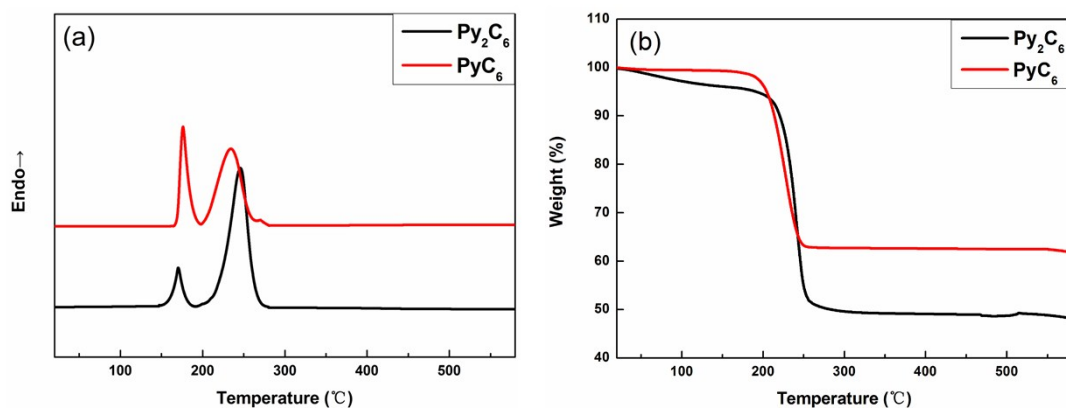

**Fig. S8** (a) DSC curves and (b) TGA curves of a series of  $\text{Py}_n\text{C}_6$  ( $n = 2, 1$ ).

**Part 5 Cyclic voltammetry (CV) for  $\text{Py}_2\text{C}_6$ ,  $\text{PyC}_6$  and PMII electrolytes using symmetrical Pt electrode.**

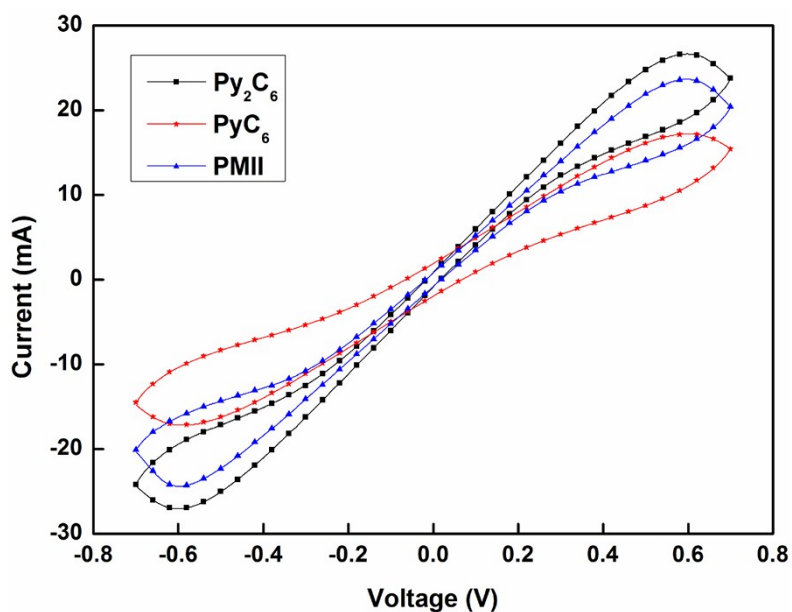

**Fig. S9** Cyclic voltammetry (CV) using symmetrical Pt electrode sandwiched with  $\text{Py}_2\text{C}_6$ ,  $\text{PyC}_6$  and PMII electrolytes at a scan rate of 100mV/s.



## Part 6 DSSC devices of equivalent circuit models

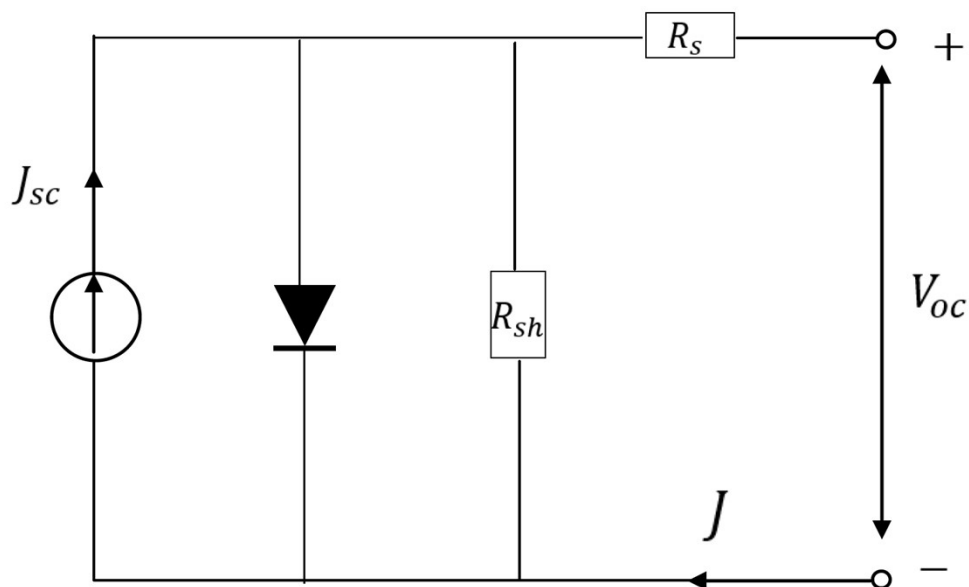

**Fig. S10** DSSC devices were conducted by the equivalent circuit models, and a p-n junction solar cell can be simulated with an ideal diode, series resistance  $R_s$ , and shunt resistance  $R_{sh}$ .

## Part 7 Long-term Stability of DSSC (Fig. S11), equivalent circuit (Fig. S12) (Table S1)

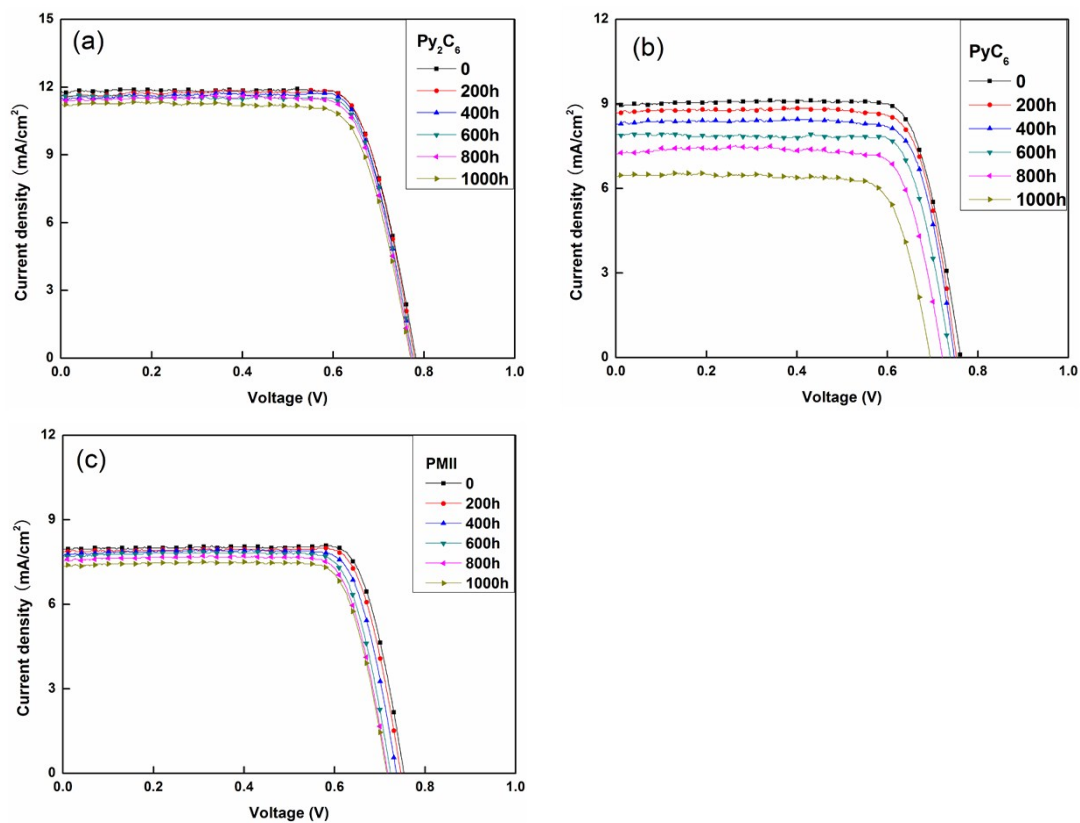

**Fig. S11**  $J$ - $V$  curves of part time based on (a)  $\text{Py}_2\text{C}_6$ , (b)  $\text{PyC}_6$  and (c) PMII electrolytes.

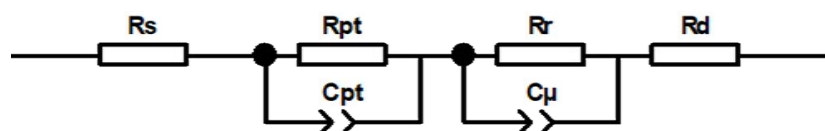

**Fig. S12** Equivalent circuit deduced from EIS curves.

**Table S1** Stability of DSSC based on (a)  $\text{Py}_2\text{C}_6$ , (b)  $\text{PyC}_6$  and (c) PMII electrolytes.

|                         | Time<br>(h)                             | 0     | 100   | 200   | 300   | 400   | 500   | 600   | 700   | 800   | 900   | 1000  |
|-------------------------|-----------------------------------------|-------|-------|-------|-------|-------|-------|-------|-------|-------|-------|-------|
| $\text{Py}_2\text{C}_6$ | $J_{sc}$<br>( $\text{mA}/\text{cm}^2$ ) | 11.78 | 11.76 | 11.64 | 11.63 | 11.60 | 11.61 | 11.61 | 11.44 | 11.43 | 11.36 | 11.24 |
|                         | $V_{oc}$<br>(V)                         | 0.779 | 0.779 | 0.778 | 0.778 | 0.776 | 0.776 | 0.775 | 0.775 | 0.773 | 0.772 | 0.771 |
|                         | $FF$<br>(%)                             | 79.55 | 79.36 | 79.40 | 79.35 | 79.21 | 78.70 | 78.58 | 78.28 | 78.21 | 78.22 | 77.20 |
|                         | $PCE$<br>(%)                            | 7.30  | 7.27  | 7.19  | 7.18  | 7.13  | 7.09  | 7.07  | 6.94  | 6.91  | 6.86  | 6.69  |
|                         | $J_{sc}$<br>( $\text{mA}/\text{cm}^2$ ) | 8.99  | 8.89  | 8.74  | 8.54  | 8.32  | 8.26  | 7.98  | 7.47  | 7.36  | 7.08  | 6.52  |
| $\text{PyC}_6$          | $V_{oc}$<br>(V)                         | 0.766 | 0.762 | 0.755 | 0.751 | 0.751 | 0.747 | 0.741 | 0.728 | 0.721 | 0.713 | 0.696 |
|                         | $FF$<br>(%)                             | 79.43 | 80.16 | 79.86 | 79.36 | 79.22 | 79.09 | 79.15 | 79.07 | 78.58 | 77.46 | 77.35 |
|                         | $PCE$<br>(%)                            | 5.47  | 5.43  | 5.27  | 5.09  | 4.95  | 4.88  | 4.68  | 4.30  | 4.17  | 3.91  | 3.51  |
|                         | $J_{sc}$<br>( $\text{mA}/\text{cm}^2$ ) | 7.97  | 7.97  | 7.89  | 7.82  | 7.80  | 7.75  | 7.72  | 7.66  | 7.57  | 7.49  | 7.38  |
|                         | $V_{oc}$<br>(V)                         | 0.754 | 0.752 | 0.749 | 0.743 | 0.739 | 0.732 | 0.727 | 0.720 | 0.720 | 0.719 | 0.717 |
| PMII                    | $FF$<br>(%)                             | 81.71 | 81.59 | 81.39 | 80.89 | 80.67 | 80.56 | 80.36 | 79.78 | 80.54 | 79.85 | 79.75 |
|                         | $PCE$<br>(%)                            | 4.91  | 4.89  | 4.81  | 4.70  | 4.65  | 4.57  | 4.51  | 4.40  | 4.39  | 4.30  | 4.22  |

## Reference

- Ganesan, K.; Ratke, L. Facile Preparation of Monolithic  $\kappa$ -Carrageenan Aerogels. *Soft Matter* **2014**, *10*, 3218-3224.
